# Supplementary material for: LncRNA ATXN8OS enhances tamoxifen resistance in breast cancer
Source: publisher site journal article supplement (doi:10.1515/med-2021-0012), 2020-12-15
Supplement: Supplementary file 1 [file med-2021-0012_sm.pdf]

# Supplementary material

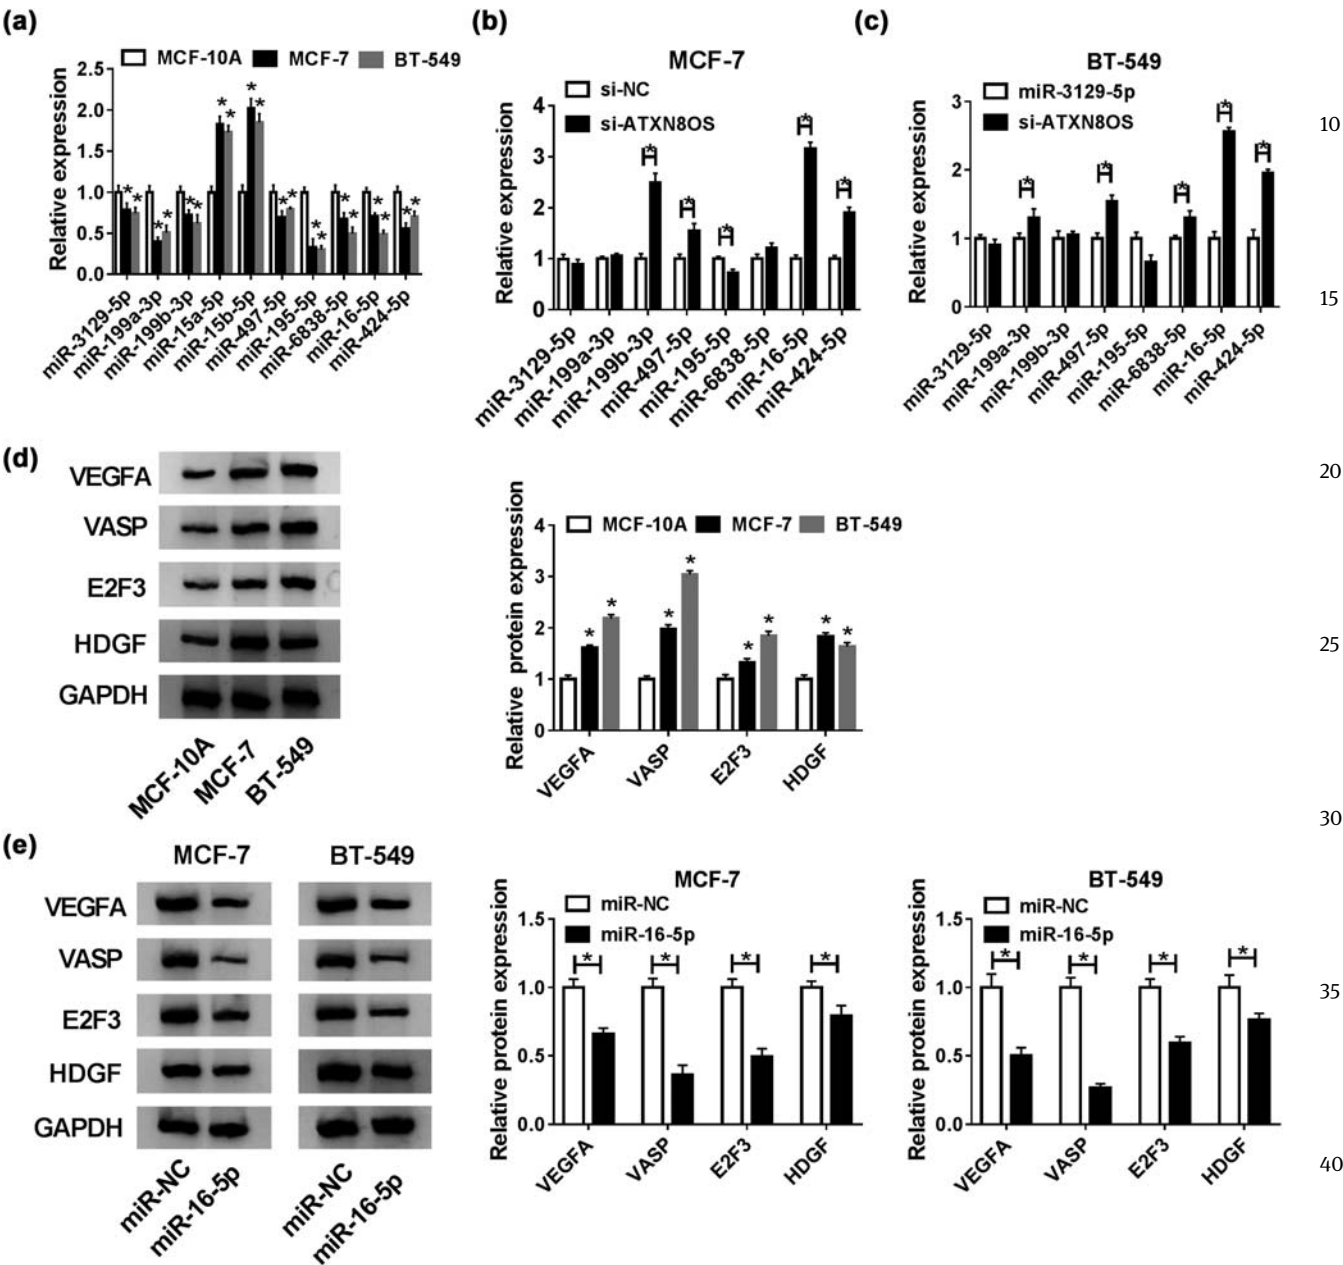

**Figure S1:** The targeted miRNAs of ATXN80S and the four targets of miR-16-5p. The expression levels of miRNAs by qRT-PCR in MCF-10A, MCF-7, and BT-549 (a), MCF-7 and BT-549 transfected with si-NC or si-ATXN80S (b and c). The protein levels of VEGFA, VASP, E2F3 and HDGF by western blot in MCF-10A, MCF-7, and BT-549 (d), MCF-7 and BT-549 transfected with si-NC or si-ATXN80S (e). \* $P < 0.05$ .

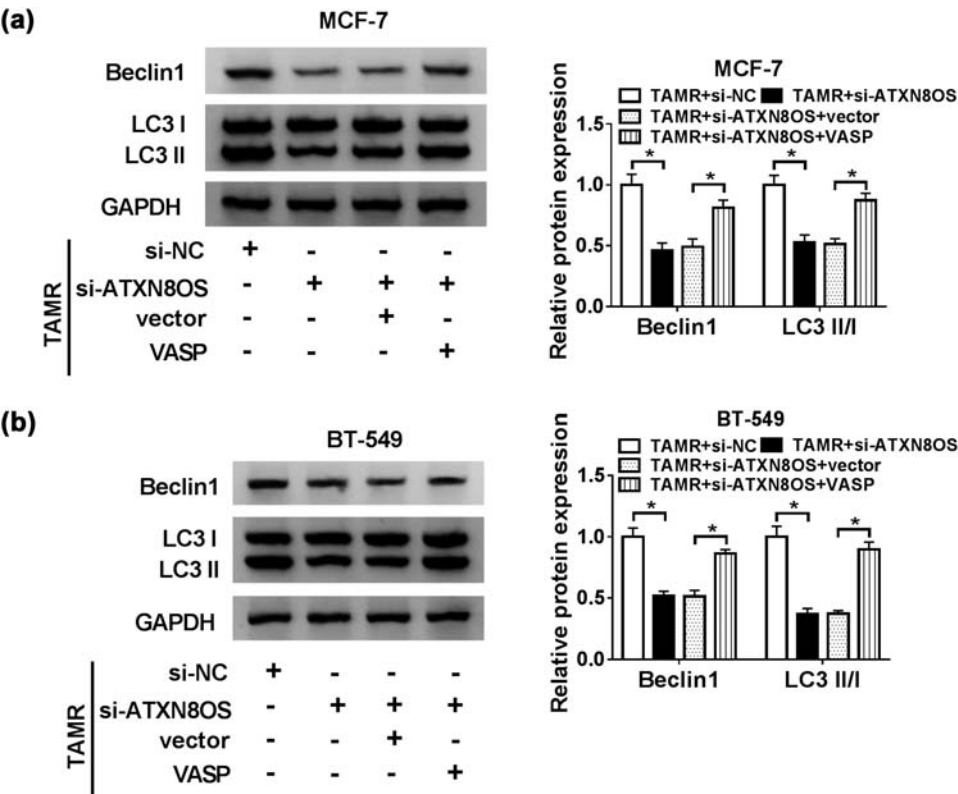

**Figure S2:** The repression of ATXN8OS knockdown on cell autophagy by VASP. The levels of Beclin 1, LC3 I and LC3 II by western blot in TAMR-treated MCF-7 (a) and BT-549 (b) cells transfected with si-NC, si-ATXN8OS, si-ATXN8OS+vector or si-ATXN8OS+VASP (VASP over-expression plasmid). \* $P < 0.05$ .
